# Supplementary material for: Parents' color-conscious racial socialization and adolescents' racial attitudes: the moderating role of parental psychological control
Source: Frontiers journal article supplement (doi:10.3389/fdpys.2024.1446938), 2024-10-28
Supplement: Data_Sheet_1.pdf [file Data_Sheet_1.pdf]

We conducted an additional analysis to examine whether parent socialization at Time 1 predicted adolescents' racial attitudes at Time 1. The model fit the data well :  $X^2(12) = 42.50, p = .96$ ; CFI = .95; RMSEA = .07; SRMR=.036. Similar to the first model results, parents' color-conscious racial socialization at Time 1 was negatively associated with adolescents' negative racial attitudes ( $\beta = -.29, p < .001$ ) at Time 2. Additionally, the interaction effect between parents' color-conscious racial socialization and psychological control on adolescents' racial attitudes was significant ( $\beta = .19, p < .001$ ). Only when parental psychological control was low or average, parents' color-conscious socialization was negatively related to adolescents' negative attitudes ( $\beta = -.48, p < .001$ ;  $\beta = -.29, p < .001$ , respectively). However, unlike the previous model results, the path between parental psychological control and adolescents' racial attitudes was also significant ( $\beta = .14, p = .002$ ).
